# Supplementary material
Source: PubMed Central journal article supplement (PMC4855922)
Supplement: JCI78815.sd.pdf [file JCI78815.sd.pdf]

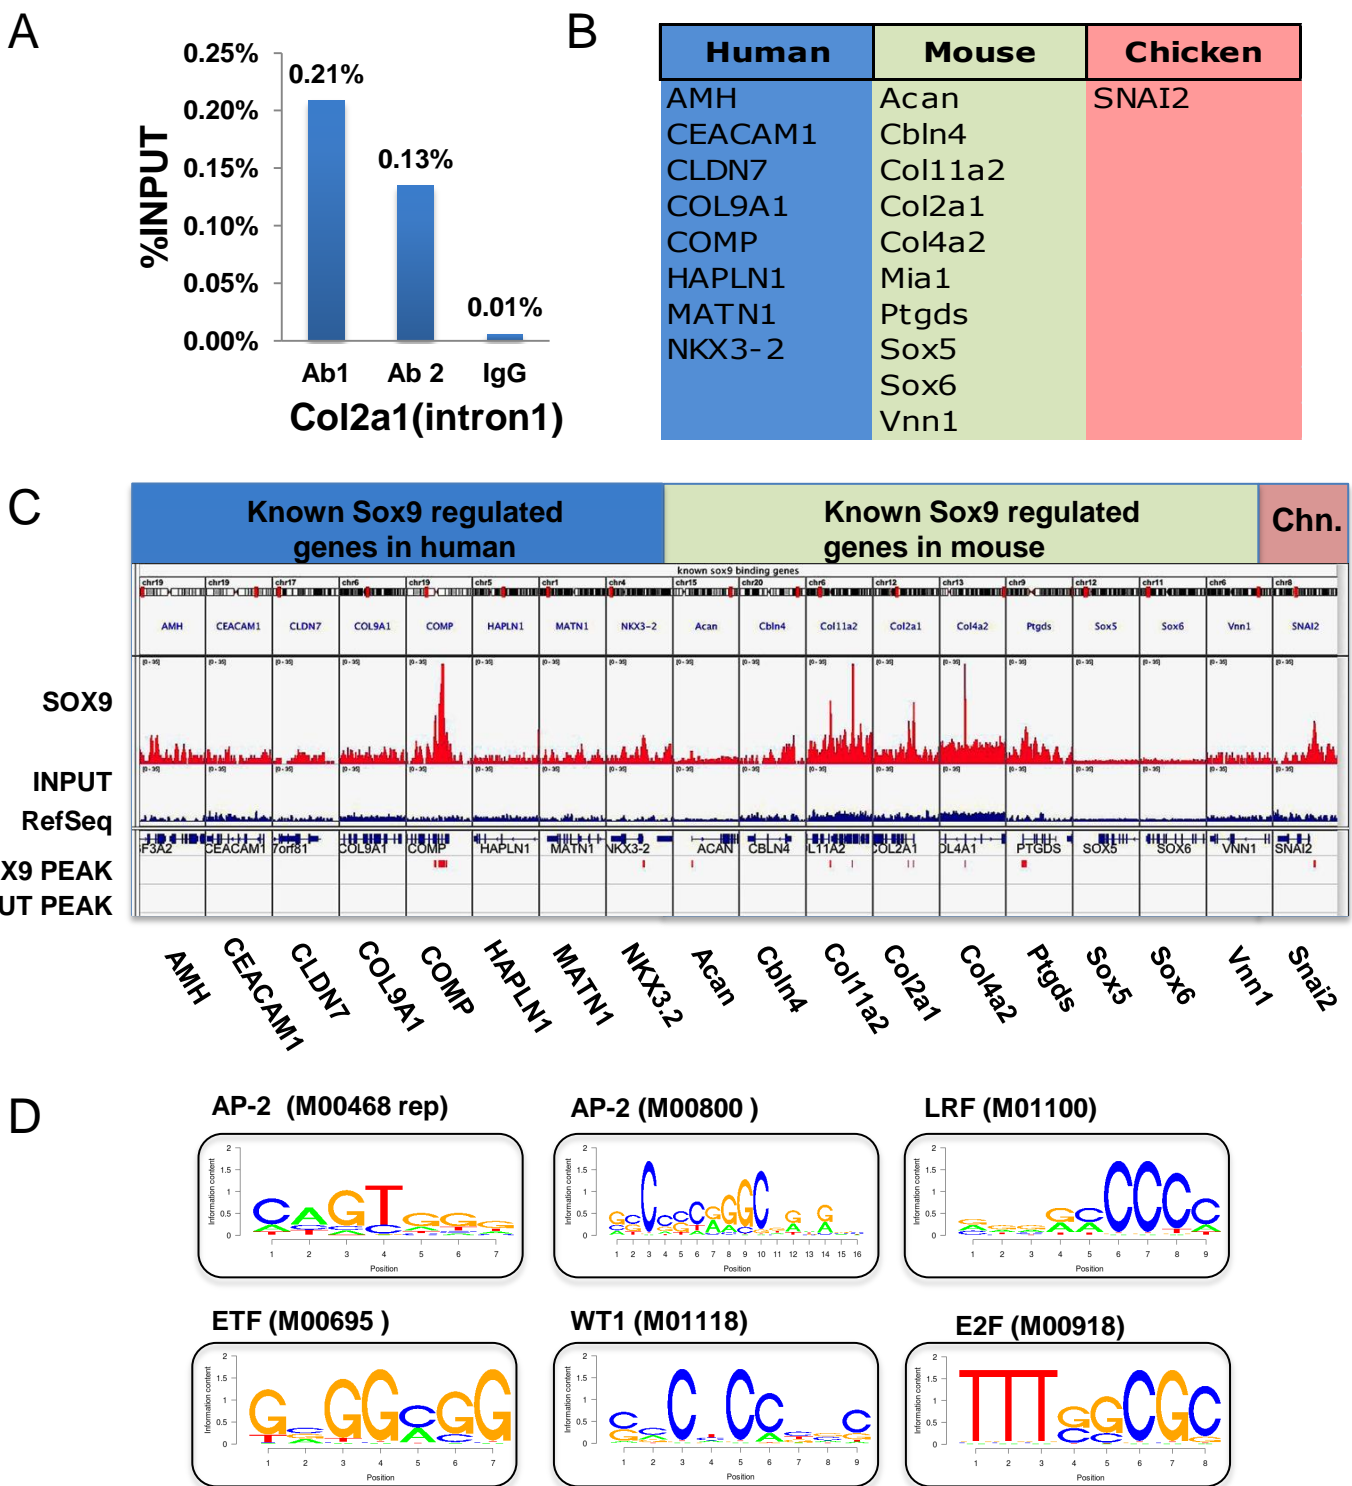

**Figure S1. SOX9 ChIP and ChIP-Seq profiling of known SOX9 target genes in VCaP cells . A.** SOX9 ChIP assay for a Col2a1 gene binding site using two independent SOX9 antibodies (Ab1 and Ab2). **B.** Known SOX9 targets in human, mouse and chicken. Adapted from transcription factor encyclopedia by Ralf Kist. <http://www.cisreg.ca/cgi-bin/tfe/articles.pl?tfid=495&tab=targets>. **C.** Binding profiles of known SOX9 targets by SOX9 ChIP-Seq. Chn: chicken. **D.** Enriched motifs of transcriptional factors within 600 bp of the summits of SOX9 binding peaks.

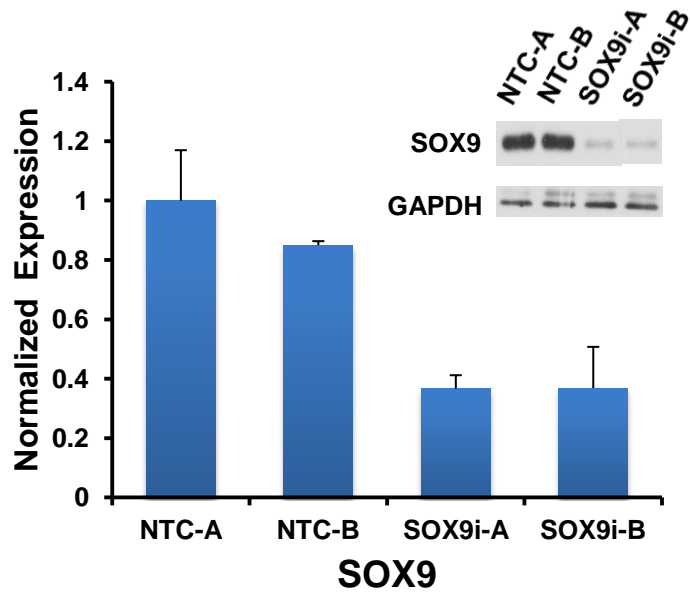

**Figure S2. SOX9 knockdown in VCaP cells.**

Cells were transfected with two independent siRNAs and total RNA and proteins were collected at 72 hrs post-transfection. The level of SOX9 were measured by qRT-PCR for mRNA or Western Blot for protein (insert). NTC: Non-Target Control siRNA.

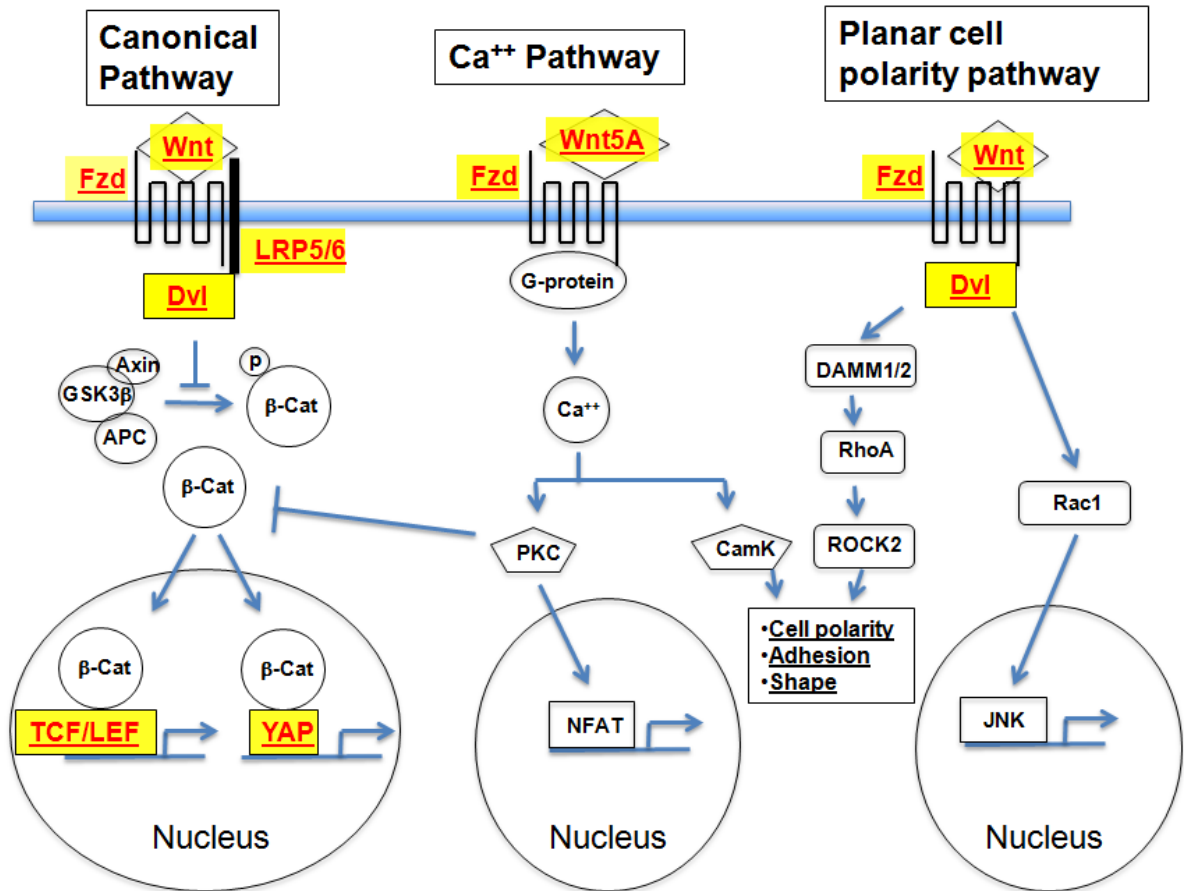

**Figure S3. Schematic demonstration of the broad SOX9 effect on WNT signaling.** The canonical and non-canonical WNT pathways are shown and those genes modulated by SOX9 are highlighted in yellow.

A

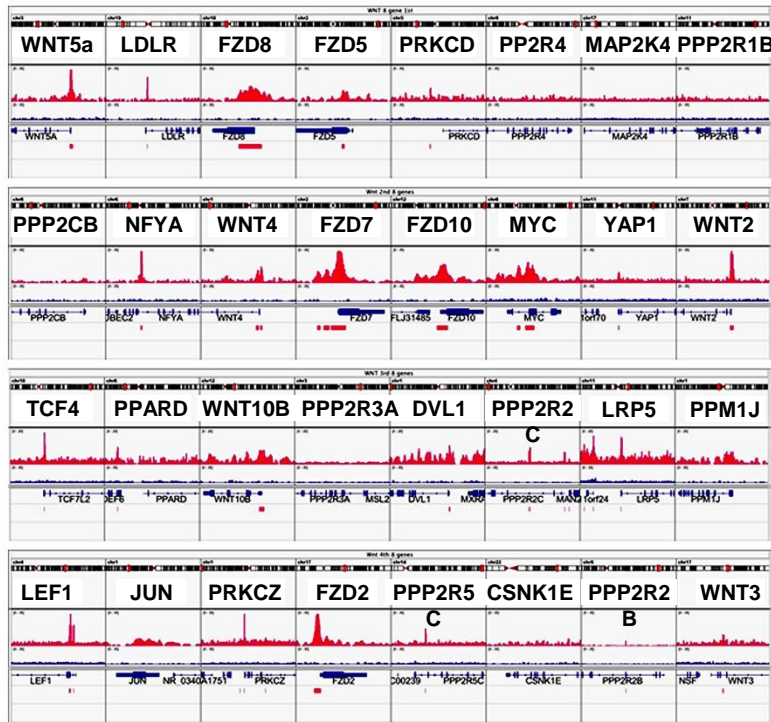

B

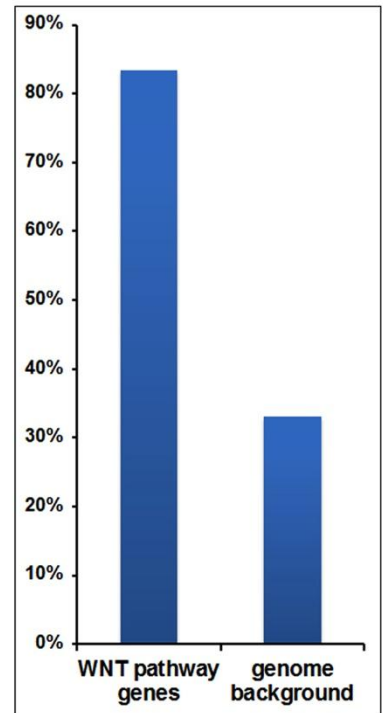

**Figure S4. Enriched SOX9 binding to WNT pathway genes.**

**A.** Representative SOX9 ChIP-seq binding profiles and peak calling of WNT component genes in VCaP cells. **B.** The percentage of genes with SOX9 binding sites within 20Kb of TSS in WNT pathways compared to the percentage of genes in human genome.

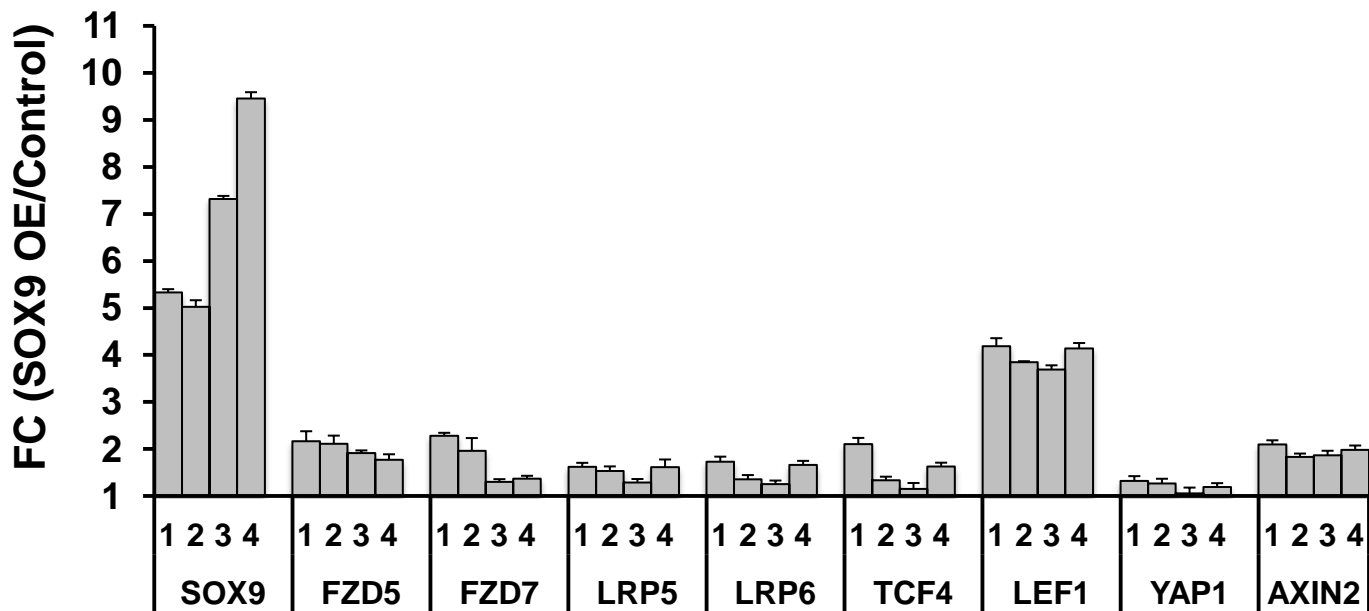

**Figure S5. Upregulation of multiple WNT components in LNCaP xenografts with SOX9 over-expression.**

Levels of SOX9 and its regulated genes were measured by qRT-PCR in xenografts from an induced LNCaP SOX9 overexpression cell line (SOX9 OE, n=4). The relative mRNA levels are shown as fold change (FC) of SOX9-OE xenografts compared with un-induced control. Error Bar: SD

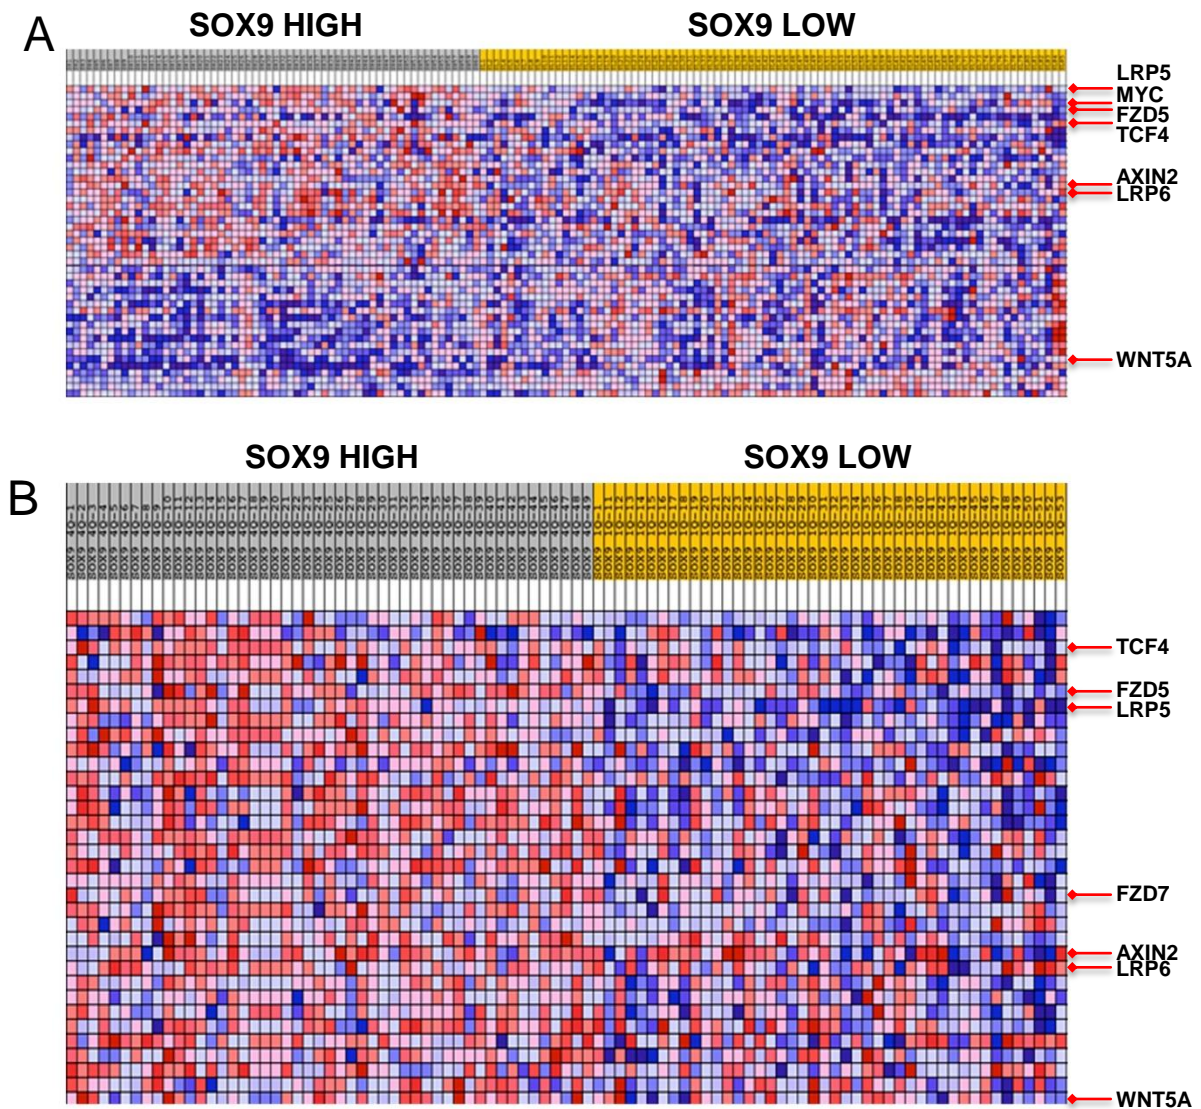

**Figure S6. SOX9 associated expression of WNT signaling in clinical PCa.** Heatmaps of the expression of WNT pathway components among patients with high versus low levels of SOX9 expression in the TCGA PCa dataset (**A**) or in an MSKCC PCa dataset (**B**). The arrows highlight the SOX9 regulated genes identified in VCaP cells. AXIN2 as a WNT activity readout is also highlighted.



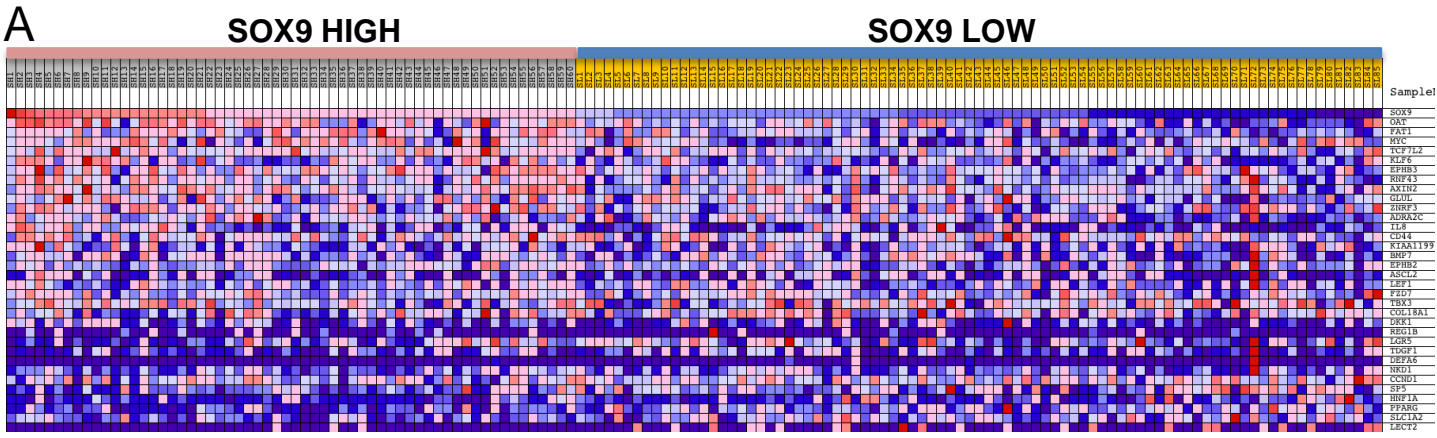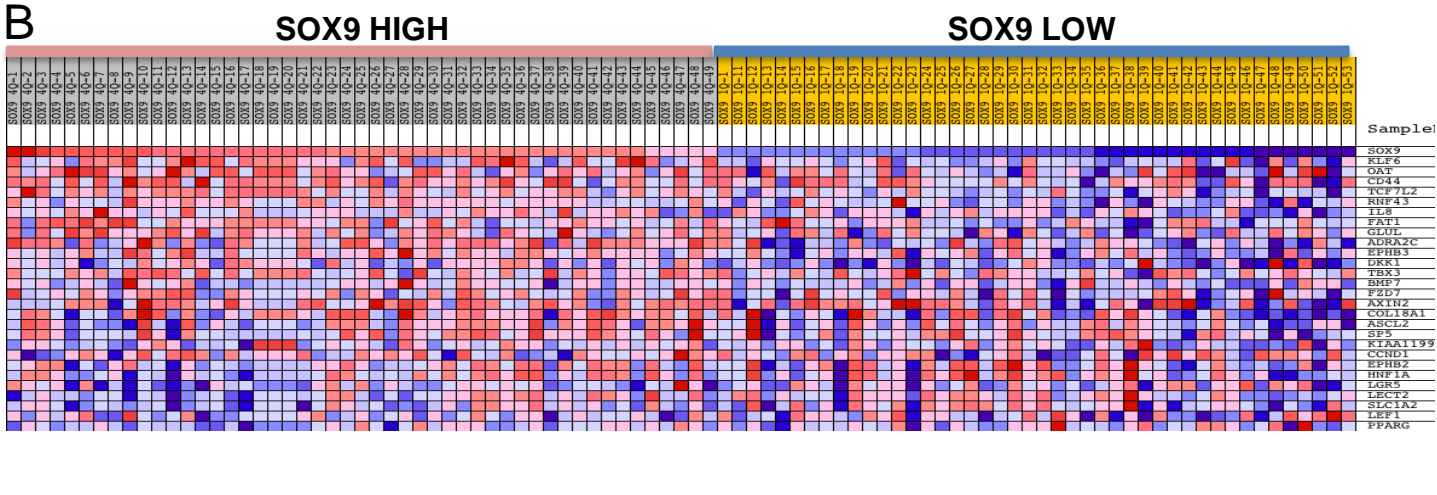

**Figure S7. Enriched WNT activation signature in SOX9 high patient group.** Heatmaps of the expression of WNT activation signature (adapted from reference 43) are shown to compare their expression among patients with high versus low levels of SOX9 expression in the TCGA data set **(A)** or in an MSKCC data set **(B)**. Note: TCF7L2 is an alias for TCF4.

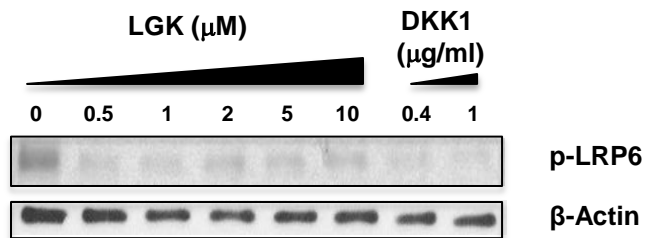

**Figure S8. WNT inhibitors suppress endogenous WNT activation in VCaP cells.** VCaP cells were treated with LGK974 or DKK1 at the indicated doses for 19 hours and were then lysed and immunoblotted.



**A****Control****LGK****AXIN2 (ISH)**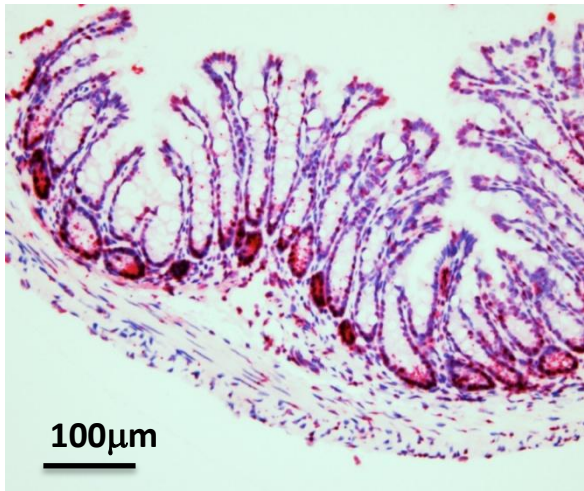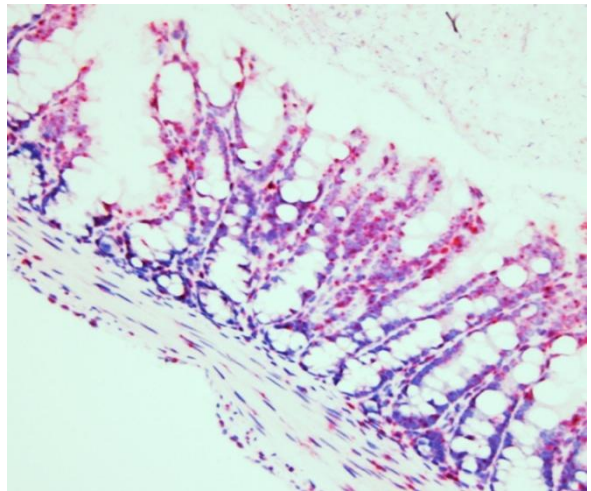**B****Control****LGK**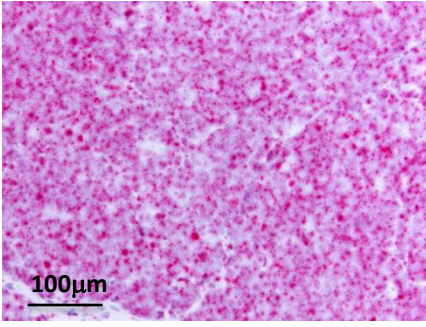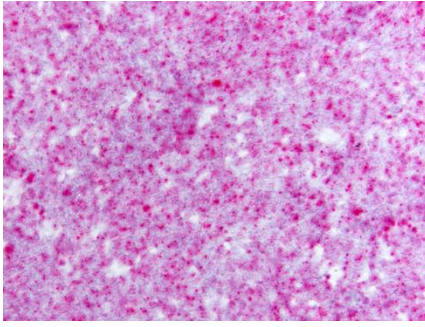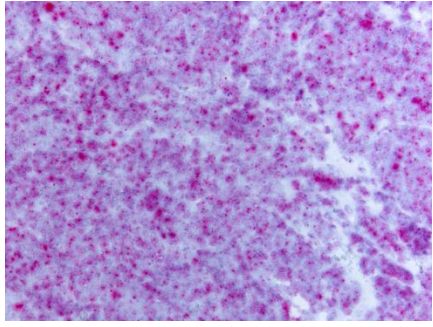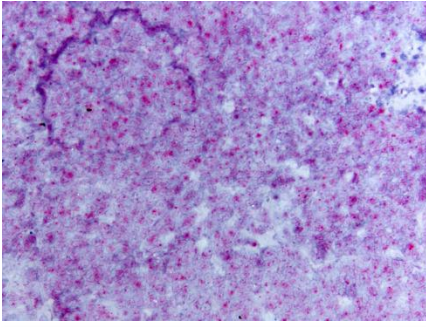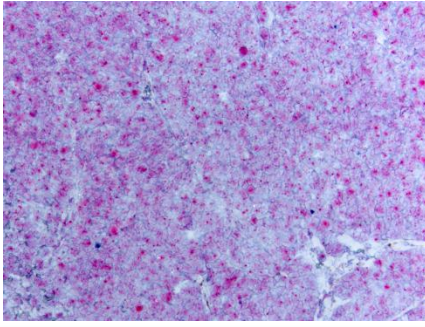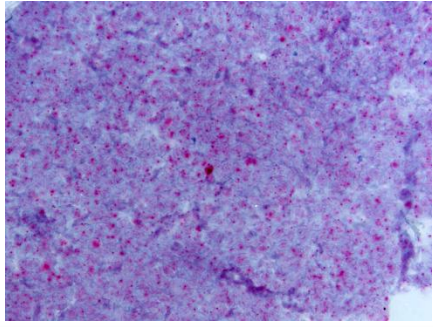**AXIN2 (ISH)**

**Figure S9. Inhibition of WNT activity after LGK974 treatment in mice.**

**A.** WNT activity in small intestine were measured by ISH of AXIN2 mRNA level in mice treated with carrier (control) or LGK. **B.** The spectrum of AXIN2 ISH intensities among VCaP xenografts from control or LGK treated mice. Scale bar: 100 μm.

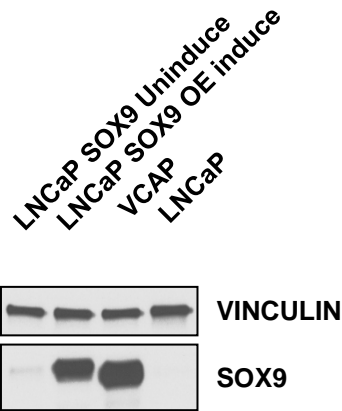

**Figure S10. Comparable SOX9 protein Levels between LNCaP-SOX9 OE and VCaP xenografts.** Proteins were extracted from xenografts derived from LNCaP-SOX9 cell line without (LNCaP SOX9 Uninduce) or with (LNCaP SOX9 OE induce) doxycycline mediated SOX9 induction; from VCaP or from the parental LNCaP cell lines. SOX9 immunoblotting is shown. Vinculin blot is also shown as an internal loading control.

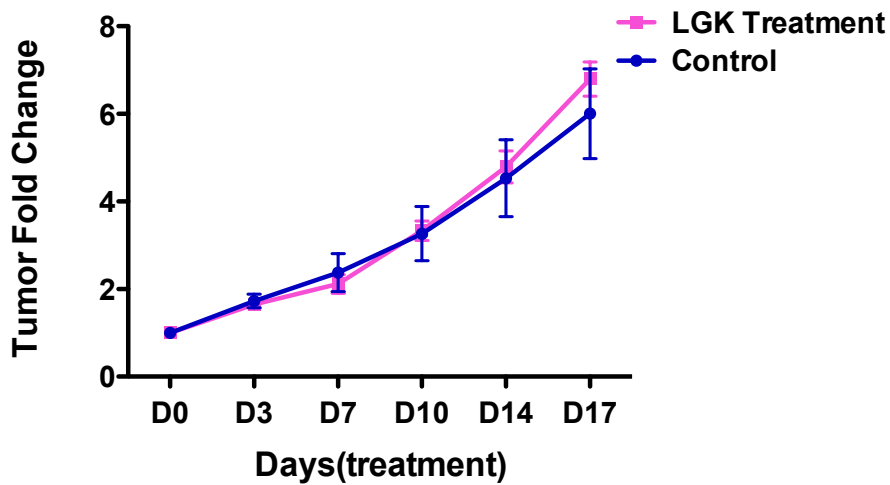

**Figure S11. LGK974 does not affect growth of xenografts derived from the parental LNCaP PCa cells.** Nude mice with established subcutaneous LNCaP xenografts were treated with carrier (n=8) or LGK974 (3mg/kg, daily IP injection, n=8). Tumor volume fold change was calculated by normalizing tumor volume at each time point to its Day 0 volume. Error Bar: SEM

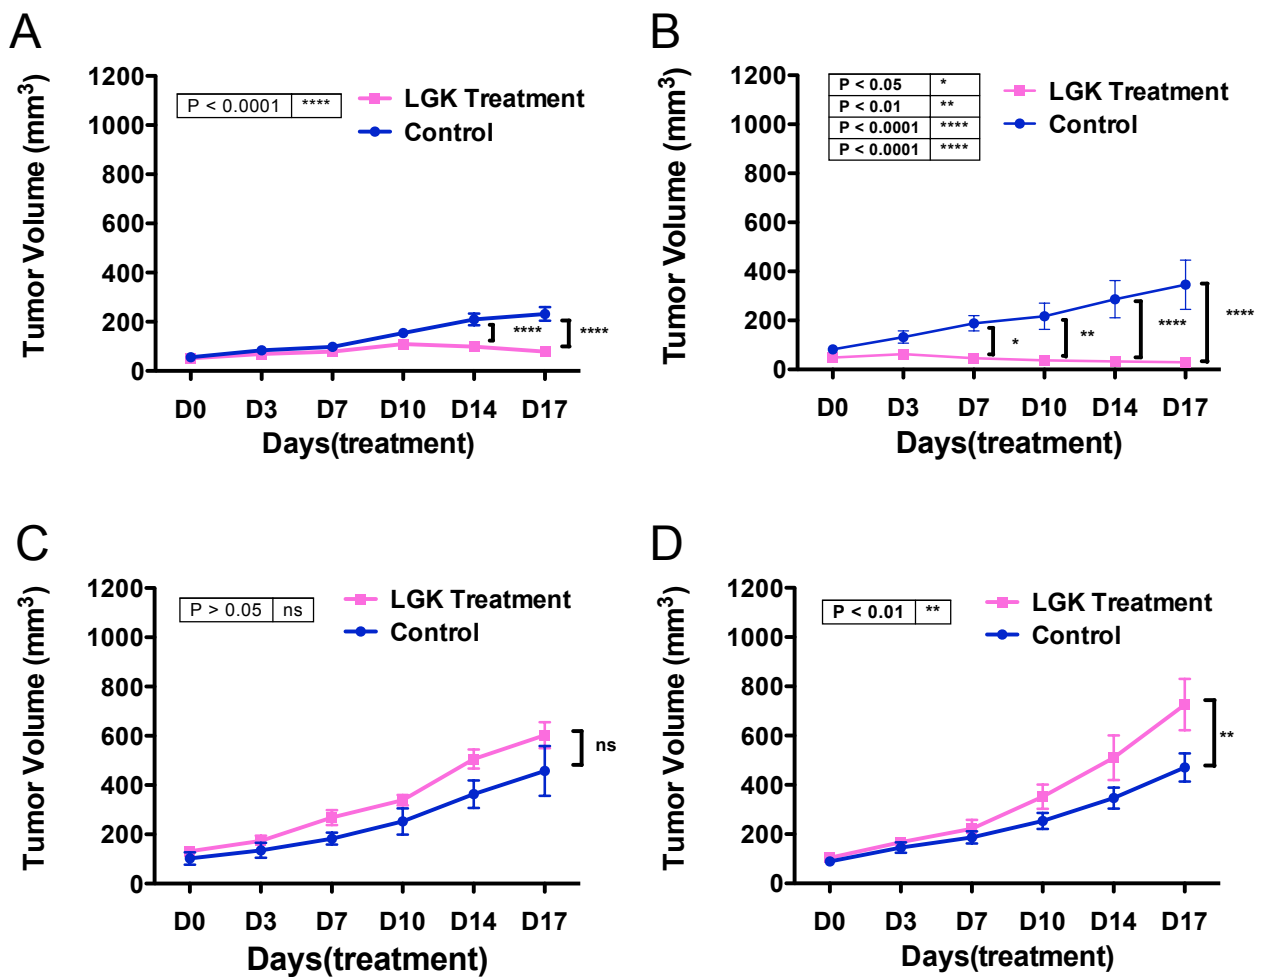

**Figure S12. Inhibition of SOX9 dependent WNT activity reduces tumor growth *in vivo*.** **A-D.** Mice with established subcutaneous xenografts from each group were randomly assigned to the control or LGK974 treatment subgroups and the tumor volumes were followed. Mice were treated daily with intraperitoneal injection of carrier (Control) or LGK974 (3mg/kg). **A.** SCID mice with established subcutaneous VCaP xenografts (Control, n=16; or LGK974 treated, n=16). **B-C.** SCID mice with inducible SOX9-overexpressing LNCaP cells were divided into induced (fed with doxycycline food and water) or un-induced (fed with regular food and water) groups. **B,** SOX9 induced (Control, n=8; and LGK treated, n=6). **C,** SOX9 un-induced (Control, n=4; and LGK treated, n=3). **D.** Nude mice with established subcutaneous wild type LNCaP xenografts (Control, n=8; or LGK974 treated, n=8). Two way ANOVA with Bonferroni post-tests were used to compare replicate means at each time point. ns P>0.05, \*P<0.05, \*\*P<0.01, \*\*\*P<0.001, \*\*\*\*P<0.0001. Error bar: Standard Error of Mean, SEM.

## Supplemental Tables

| ID     | Sym        | Consensus        | Numhits | Mean  | Cutoff | Zscore | p-value  |
|--------|------------|------------------|---------|-------|--------|--------|----------|
| M00189 | AP-2       | ..CCC.C.GGCG     | 7544    | -0.04 | 2.95   | -15.93 | 1.00E-30 |
| M00915 | AP-2       | ....CC.C.GGC.    | 7541    | -0.04 | 2.56   | -14.86 | 1.00E-30 |
| M00800 | AP-2       | G.C.SCRGGC.G.G.. | 7239    | -0.04 | 4.12   | -14.52 | 1.00E-30 |
| M00469 | AP-2alpha  | GCC....G.        | 7480    | -0.03 | 4.01   | -11.72 | 1.00E-30 |
| M00470 | AP-2gamma  | GCC...GG.        | 7498    | -0.03 | 3.94   | -10.35 | 2.01E-25 |
| M01047 | AP-2alphaA | ..CGCCT.AGGCG..  | 7299    | -0.02 | 1.02   | -4.01  | 3.06E-05 |
| M01045 | AP-2alphaA | ...GCCT.AGGG...  | 7125    | 0     | 3.18   | 3.1    | 9.99E-01 |
| M00918 | E2F        | TTTGGCGC.        | 7126    | -0.05 | 3.54   | -19.86 | 1.00E-30 |
| M00920 | E2F        | ..CGCGCSAAA.     | 7280    | -0.04 | 3.05   | -16.05 | 1.00E-30 |
| M00919 | E2F        | .CGCGCCAAA.      | 7404    | -0.04 | 2.81   | -14.98 | 1.00E-30 |
| M00425 | E2F        | TTTCGCGC         | 2106    | -0.07 | 5.85   | -12.87 | 1.00E-30 |
| M00516 | E2F        | TTTSGCGCG...     | 6784    | -0.03 | 3.07   | -10.46 | 6.88E-26 |
| M00427 | E2F        | TTTSGCGC         | 4649    | -0.03 | 5.3    | -7.46  | 4.48E-14 |
| M00050 | E2F        | TTTSGCGC         | 5715    | -0.03 | 3.83   | -6.99  | 1.38E-12 |
| M00426 | E2F        | TTTSGCGC         | 904     | -0.05 | 6.98   | -5     | 2.80E-07 |
| M01114 | E2F        | ..TTTCCC GC.     | 1062    | -0.03 | 7.48   | -2.02  | 2.16E-02 |
| M00024 | E2F        | T..GCGCGAAAA.TG  | 52      | -0.01 | 9.53   | 2.07   | 9.81E-01 |
| M00775 | NF-Y       | ....RCCAATCA     | 2048    | -0.17 | 7.83   | -36.3  | 1.00E-30 |
| M00185 | NF-Y       | .AACCAAT.A.      | 2081    | -0.16 | 7.63   | -34.53 | 1.00E-30 |
| M00209 | NF-Y       | .CTGATTGGYTA..   | 1004    | -0.19 | 7.66   | -27.24 | 1.00E-30 |
| M00716 | ZF5        | G.GCGCGR         | 7284    | -0.08 | 3.99   | -31.16 | 1.00E-30 |
| M00695 | ETF        | G.GGCGG          | 7361    | -0.06 | 5.02   | -23.14 | 1.00E-30 |
| M00243 | Egr-1      | .TGCGTGGGCGT     | 7462    | -0.02 | 0.95   | -4.37  | 6.26E-06 |

**Table S1. Enriched motifs of potential SOX9 cofactors in VCaP.**

A list of the top ranked transcriptional factor binding motifs within 600 bp of the summits of the SOX9 binding peaks based on SOX9 Chip-seq results. ID: motif ID; Sym: transcription factor symbol; Numhits: number of hits.

| Gene Symbol                           | FC ([SOX9i-A] vs [NTC]) | FC ([SOX9i-B] vs [NTC]) | Response to SOX9i |
|---------------------------------------|-------------------------|-------------------------|-------------------|
| <b>SOX9</b>                           | <b>-1.781</b>           | <b>-2.964</b>           | <b>down</b>       |
| <b>PLAT</b>                           | -7.466                  | -11.159                 | down              |
| <b>CCL2</b>                           | -6.653                  | -9.334                  | down              |
| ART3                                  | -2.236                  | -5.747                  | down              |
| NPY6R                                 | -4.004                  | -5.615                  | down              |
| TNFSF15                               | -2.762                  | -5.101                  | down              |
| ESRRG                                 | -4.026                  | -4.880                  | down              |
| <b>CXCL10</b>                         | -2.718                  | -4.829                  | down              |
| <b>CCL20</b>                          | -3.056                  | -4.407                  | down              |
| <b>IL8</b>                            | -3.264                  | -4.379                  | down              |
| <b>FZD7</b>                           | -2.696                  | -4.282                  | down              |
| LOC100506548///RPL37                  | -1.594                  | -4.256                  | down              |
| PTH2R                                 | -3.628                  | -4.034                  | down              |
| DSCR6                                 | -1.580                  | -3.884                  | down              |
| LTF                                   | -2.497                  | -3.799                  | down              |
| TESC                                  | -2.348                  | -3.741                  | down              |
| CA12                                  | -1.753                  | -3.694                  | down              |
| RBM24                                 | -2.188                  | -3.581                  | down              |
| <b>CXCL5</b>                          | -2.208                  | -3.580                  | down              |
| SCUBE2                                | -3.211                  | -3.467                  | down              |
| ERP27                                 | -1.639                  | -3.401                  | down              |
| MAB21L3                               | -1.715                  | -3.336                  | down              |
| <b>PDGFC</b>                          | -4.085                  | -3.326                  | down              |
| <b>TXNIP</b>                          | -2.277                  | -3.230                  | down              |
| <b>CXCL1</b>                          | -2.682                  | -3.213                  | down              |
| C17orf99                              | -2.046                  | -3.186                  | down              |
| MUM1L1                                | -2.805                  | -3.162                  | down              |
| LYRM7                                 | -1.716                  | -3.147                  | down              |
| KISS1R                                | -1.931                  | -3.013                  | down              |
| NRIP3                                 | -2.949                  | -2.960                  | down              |
| <b>GADD45A</b>                        | -2.307                  | -2.899                  | down              |
| <b>ARRDC4</b>                         | -2.900                  | -2.769                  | down              |
| SLC24A2                               | -1.789                  | -2.635                  | down              |
| LOC100505865                          | -1.904                  | -2.610                  | down              |
| P4HA1                                 | -2.602                  | -2.592                  | down              |
| SLC16A10                              | -1.968                  | -2.578                  | down              |
| MXI1                                  | -2.321                  | -2.530                  | down              |
| IL17RD                                | -1.753                  | -2.524                  | down              |
| EPB41L4A-AS1                          | -1.554                  | -2.509                  | down              |
| <b>VEGFA</b>                          | -1.850                  | -2.503                  | down              |
| CXCR7                                 | -1.833                  | -2.499                  | down              |
| CXCL6                                 | -1.827                  | -2.493                  | down              |
| TGIF2                                 | -2.801                  | -2.474                  | down              |
| PRKX///PRKY                           | -1.531                  | -2.473                  | down              |
| TIFA                                  | -1.988                  | -2.447                  | down              |
| RGS7                                  | -1.621                  | -2.438                  | down              |
| REPS2                                 | -1.662                  | -2.426                  | down              |
| CTTNBP2                               | -2.753                  | -2.417                  | down              |
| ADORA2B///LOC100652851///LOC100653318 | -1.968                  | -2.412                  | down              |
| C17orf48                              | -1.552                  | -2.396                  | down              |
| <b>KLF10</b>                          | -2.146                  | -2.376                  | down              |
| PERP                                  | -1.593                  | -2.372                  | down              |
| C8orf4                                | -2.208                  | -2.368                  | down              |
| SLC22A16                              | -1.839                  | -2.364                  | down              |
| RNF44                                 | -1.542                  | -2.364                  | down              |
| IKBKB                                 | -1.711                  | -2.348                  | down              |

|                                          |        |        |      |
|------------------------------------------|--------|--------|------|
| ACSL5                                    | -2.514 | -2.331 | down |
| LINGO1                                   | -1.719 | -2.308 | down |
| FAM174B                                  | -1.585 | -2.299 | down |
| HSPG2                                    | -1.606 | -2.295 | down |
| CXCL3                                    | -1.866 | -2.285 | down |
| PFKP                                     | -1.789 | -2.275 | down |
| SNAP25                                   | -1.553 | -2.270 | down |
| ARHGAP24                                 | -2.578 | -2.258 | down |
| MXRA7                                    | -1.943 | -2.249 | down |
| LOC100506776                             | -2.194 | -2.240 | down |
| YAP1                                     | -2.036 | -2.232 | down |
| TOX3                                     | -1.501 | -2.231 | down |
| PAQR5                                    | -1.988 | -2.221 | down |
| GSTO2                                    | -2.072 | -2.199 | down |
| FAM3D                                    | -1.563 | -2.197 | down |
| MCC                                      | -1.644 | -2.184 | down |
| ADA                                      | -1.506 | -2.150 | down |
| SCN4B                                    | -2.188 | -2.140 | down |
| GABBR1///UBD                             | -2.090 | -2.139 | down |
| PROCR                                    | -2.092 | -2.134 | down |
| TNFRSF11A                                | -2.571 | -2.126 | down |
| BIRC3                                    | -2.115 | -2.126 | down |
| PODXL                                    | -1.846 | -2.125 | down |
| CAMKV                                    | -1.500 | -2.104 | down |
| DNASE1L3                                 | -1.536 | -2.092 | down |
| GGT1///GGT2///GGTLC2///<br>GGT3P         | -1.736 | -2.084 | down |
| GGT1///GGT2///GGTLC2///<br>GGT3P///GGT8P | -1.724 | -2.082 | down |
| LITAF                                    | -1.721 | -2.076 | down |
| TNFSF10                                  | -2.151 | -2.058 | down |
| C11orf70                                 | -2.113 | -2.056 | down |
| NRCAM                                    | -1.880 | -2.056 | down |
| GGTLC1                                   | -1.677 | -2.051 | down |
| CEP68                                    | -1.556 | -2.044 | down |
| GGT1///GGT2///GGTLC2///<br>GGT3P///GGT8P | -1.704 | -2.038 | down |
| LOC645249                                | -1.876 | -2.022 | down |
| PRAME                                    | -2.315 | -2.012 | down |

**Table S2. SOX9 activated gene in VCaP cells.**

Relative fold changes (FC) of mRNA levels measured by microarray analyses. Those genes randomly selected for further qPT-PCR validation are highlighted in yellow.



| Gene Symbol            | FC ([SOX9i-A] vs [NTC]) | FC ([SOX9i-B] vs [NTC]) | Response to SOX9i |
|------------------------|-------------------------|-------------------------|-------------------|
| <b>SOX9</b>            | <b>-1.781</b>           | <b>-2.964</b>           | <b>down</b>       |
| ANXA1                  | 1.676                   | 4.072                   | up                |
| BHLHE40                | 1.781                   | 2.672                   | up                |
| INSIG1                 | 2.126                   | 2.005                   | up                |
| LUM                    | 1.624                   | 4.103                   | up                |
| ARG2                   | 3.510                   | 2.448                   | up                |
| S100P                  | 2.007                   | 2.183                   | up                |
| TOX                    | 1.664                   | 2.139                   | up                |
| IDI1                   | 1.665                   | 2.434                   | up                |
| DPYD                   | 1.672                   | 2.119                   | up                |
| NAP1L3                 | 1.622                   | 2.804                   | up                |
| TFF1                   | 1.604                   | 2.902                   | up                |
| MMP10                  | 2.940                   | 4.258                   | up                |
| HMGCS1                 | 1.817                   | 2.796                   | up                |
| TAF13                  | 1.545                   | 2.240                   | up                |
| <b>WNT5A</b>           | 2.085                   | 3.036                   | up                |
| GCG                    | 4.701                   | 2.200                   | up                |
| RORB                   | 2.507                   | 2.017                   | up                |
| UGT2B4                 | 1.800                   | 9.602                   | up                |
| SI                     | 1.868                   | 6.733                   | up                |
| CSRP2                  | 1.550                   | 2.034                   | up                |
| UGT2B17                | 1.672                   | 7.479                   | up                |
| SLC30A4                | 3.060                   | 3.967                   | up                |
| <b>SHH</b>             | 2.243                   | 2.159                   | up                |
| ID1                    | 2.043                   | 2.751                   | up                |
| MSMO1                  | 1.504                   | 2.343                   | up                |
| ACAT2                  | 1.703                   | 2.686                   | up                |
| GPR37                  | 1.822                   | 2.842                   | up                |
| ALB                    | 2.475                   | 2.963                   | up                |
| UGT2B28                | 1.663                   | 5.258                   | up                |
| KCTD12                 | 1.976                   | 2.405                   | up                |
| PVRL3                  | 1.699                   | 2.988                   | up                |
| OAZ3                   | 1.771                   | 2.004                   | up                |
| MIR22///MIR22H<br>G    | 2.117                   | 2.912                   | up                |
| HLA-DRB1               | 1.722                   | 2.007                   | up                |
| OSTM1                  | 2.116                   | 2.861                   | up                |
| SAR1B                  | 1.613                   | 2.170                   | up                |
| GREM1                  | 1.587                   | 2.024                   | up                |
| C7orf63                | 1.870                   | 2.065                   | up                |
| LRRTM4                 | 2.447                   | 2.100                   | up                |
| COL5A2                 | 2.220                   | 2.411                   | up                |
| ARHGEF26               | 2.014                   | 2.030                   | up                |
| ADAMTS1                | 2.144                   | 2.400                   | up                |
| REG4                   | 3.131                   | 2.124                   | up                |
| C15orf48               | 2.844                   | 3.141                   | up                |
| TMEM79                 | 1.677                   | 2.177                   | up                |
| FAM84A///LOC65<br>3602 | 1.708                   | 2.846                   | up                |
| STARD4                 | 2.226                   | 3.595                   | up                |
| SAMD5                  | 2.012                   | 2.177                   | up                |
| SLC45A3                | 2.446                   | 2.179                   | up                |
| TMEM178A               | 3.048                   | 3.246                   | up                |
| RUSC1-AS1              | 1.640                   | 2.365                   | up                |
| LOC100507025           | 1.663                   | 2.595                   | up                |
| DSEL                   | 2.546                   | 4.428                   | up                |
| CDH26                  | 2.119                   | 2.073                   | up                |
| GPR137C                | 1.732                   | 2.741                   | up                |
| HMG2P46                | 9.911                   | 4.638                   | up                |
| RFX6                   | 3.808                   | 3.023                   | up                |
| C15orf37               | 1.552                   | 2.448                   | up                |
| LOC401068              | 1.695                   | 2.620                   | up                |
| LOC100506995           | 1.572                   | 2.924                   | up                |

**Table S3. SOX9 Suppressed genes in VCaP cells.**

Relative fold changes (FC) of mRNA levels measured by microarray analyses. Those genes randomly selected for further qPT-PCR validation are highlighted in yellow.

| GENESET NAME                                                     | SIZE | ES    | NES   | NOM p-val |
|------------------------------------------------------------------|------|-------|-------|-----------|
| KEGG_ALLOGRAFT_REJECTION                                         | 34   | 0.456 | 1.363 | <0.001    |
| KEGG_RIBOSOME                                                    | 79   | 0.502 | 1.253 | <0.001    |
| KEGG_GRAFT_VERSUS_HOST_DISEASE                                   | 37   | 0.380 | 1.230 | <0.001    |
| KEGG_MATURITY_ONSET_DIABETES_OF_THE_YOUNG                        | 19   | 0.475 | 1.202 | <0.001    |
| KEGG_HEDGEHOG_SIGNALING_PATHWAY                                  | 53   | 0.351 | 1.197 | <0.001    |
| KEGG_INOSITOL_PHOSPHATE_METABOLISM                               | 46   | 0.321 | 1.179 | <0.001    |
| KEGG_BASAL_CELL_CARCINOMA                                        | 53   | 0.403 | 1.163 | <0.001    |
| KEGG_MELANOGENESIS                                               | 98   | 0.342 | 1.161 | <0.001    |
| KEGG_APOPTOSIS                                                   | 82   | 0.306 | 1.157 | <0.001    |
| KEGG_PRION_DISEASES                                              | 35   | 0.333 | 1.139 | <0.001    |
| KEGG_CALCIIUM_SIGNALING_PATHWAY                                  | 171  | 0.222 | 1.128 | <0.001    |
| KEGG_TYPE_I_DIABETES_MELLITUS                                    | 40   | 0.409 | 1.126 | <0.001    |
| KEGG_MAPK_SIGNALING_PATHWAY                                      | 256  | 0.311 | 1.126 | <0.001    |
| KEGG_DILATED_CARDIOMYOPATHY                                      | 89   | 0.278 | 1.119 | <0.001    |
| KEGG_GALACTOSE_METABOLISM                                        | 25   | 0.355 | 1.096 | <0.001    |
| KEGG_NEUROACTIVE_LIGAND_RECEPTOR_INTERACTION                     | 252  | 0.206 | 1.095 | <0.001    |
| KEGG_ANTIEN_PROCESSING_AND_PRESENTATION                          | 81   | 0.290 | 1.091 | <0.001    |
| KEGG_GLYXYLATE_AND_DICARBOXYLATE_METABOLISM                      | 15   | 0.419 | 1.091 | <0.001    |
| KEGG_NOTCH_SIGNALING_PATHWAY                                     | 41   | 0.277 | 1.087 | <0.001    |
| KEGG_HYPERTROPHIC_CARDIOMYOPATHY_HCM                             | 82   | 0.272 | 1.077 | <0.001    |
| KEGG_HEMATOPOIETIC_CELL_LINEAGE                                  | 83   | 0.242 | 1.073 | <0.001    |
| KEGG_LEUKOCYTE_TRANSENDOTHELIAL_MIGRATION                        | 107  | 0.278 | 1.073 | <0.001    |
| KEGG_TYPE_II_DIABETES_MELLITUS                                   | 44   | 0.288 | 1.053 | <0.001    |
| KEGG_LONG_TERM_DEPRESSION                                        | 66   | 0.253 | 1.052 | <0.001    |
| KEGG_JAK_STAT_SIGNALING_PATHWAY                                  | 151  | 0.227 | 1.051 | <0.001    |
| KEGG_PENTOSE_PHOSPHATE_PATHWAY                                   | 26   | 0.428 | 1.041 | <0.001    |
| KEGG_CELL_ADHESION_MOLECULES_CAMS                                | 125  | 0.307 | 1.038 | <0.001    |
| KEGG_GLYCOLYSIS_GLUONEOGENESIS                                   | 60   | 0.357 | 1.031 | <0.001    |
| KEGG_GLYCOSAMINOGLYCAN_BIOSYNTHESIS_KERATAN_SULFATE              | 15   | 0.450 | 1.030 | <0.001    |
| KEGG_NATURAL_KILLER_CELL_MEDIATED_CYTOTOXICITY                   | 129  | 0.241 | 1.026 | <0.001    |
| KEGG_ONE_CARBON_POOL_BY_FOLATE                                   | 16   | 0.361 | 1.016 | <0.001    |
| KEGG_SMALL_CELL_LUNG_CANCER                                      | 82   | 0.274 | 1.005 | <0.001    |
| KEGG_PURINE_METABOLISM                                           | 149  | 0.361 | 1.000 | <0.001    |
| KEGG_CYSTEINE_AND_METHIONINE_METABOLISM                          | 31   | 0.405 | 1.000 | <0.001    |
| KEGG_O_GLYCAN_BIOSYNTHESIS                                       | 29   | 0.526 | 1.000 | <0.001    |
| KEGG_GLYCOSAMINOGLYCAN_BIOSYNTHESIS_HEPARAN_SULFATE              | 25   | 0.547 | 1.000 | <0.001    |
| KEGG_RNA_POLYMERASE                                              | 28   | 0.347 | 1.000 | <0.001    |
| KEGG_CYTOKINE_CYTOKINE_RECEPTOR_INTERACTION                      | 245  | 0.516 | 1.000 | <0.001    |
| KEGG_CHEMOKINE_SIGNALING_PATHWAY                                 | 173  | 0.500 | 1.000 | <0.001    |
| KEGG_WNT_SIGNALING_PATHWAY                                       | 144  | 0.352 | 1.000 | <0.001    |
| KEGG_DORSO_VENTRAL_AXIS_FORMATION                                | 23   | 0.301 | 1.000 | <0.001    |
| KEGG_COMPLEMENT_AND_COAGULATION_CASCADES                         | 66   | 0.439 | 1.000 | <0.001    |
| KEGG_TOLL_LIKE_RECEPTOR_SIGNALING_PATHWAY                        | 98   | 0.348 | 1.000 | <0.001    |
| KEGG_NOD_LIKE_RECEPTOR_SIGNALING_PATHWAY                         | 51   | 0.635 | 1.000 | <0.001    |
| KEGG_RIG_I_LIKE_RECEPTOR_SIGNALING_PATHWAY                       | 65   | 0.372 | 1.000 | <0.001    |
| KEGG_CYTOSOLIC_DNA_SENSING_PATHWAY                               | 51   | 0.343 | 1.000 | <0.001    |
| KEGG_INTESTINAL_IMMUNE_NETWORK_FOR_IGA_PRODUCTION                | 45   | 0.395 | 1.000 | <0.001    |
| KEGG_TASTE_TRANSDUCTION                                          | 44   | 0.494 | 1.000 | <0.001    |
| KEGG_THYROID_CANCER                                              | 29   | 0.389 | 1.000 | <0.001    |
| KEGG_BLADDER_CANCER                                              | 40   | 0.329 | 1.000 | <0.001    |
| KEGG_ASTHMA                                                      | 27   | 0.512 | 1.000 | <0.001    |
| KEGG_AUTOIMMUNE_THYROID_DISEASE                                  | 49   | 0.295 | 1.000 | <0.001    |
| KEGG_PRIMARY_IMMUNODEFICIENCY                                    | 35   | 0.467 | 1.000 | <0.001    |
| KEGG_PATHWAYS_IN_CANCER                                          | 315  | 0.253 | 0.992 | 0.510     |
| KEGG_P53_SIGNALING_PATHWAY                                       | 64   | 0.373 | 0.983 | 0.493     |
| KEGG_PYRIMIDINE_METABOLISM                                       | 88   | 0.287 | 0.977 | 0.493     |
| KEGG_EPITHELIAL_CELL_SIGNALING_IN_HELICOBACTER_PYLORI_INFECTIION | 62   | 0.341 | 0.971 | 0.510     |

|                                                           |     |       |       |       |
|-----------------------------------------------------------|-----|-------|-------|-------|
| KEGG_SNARE_INTERACTIONS_IN_VESICULAR_TRANSPORT            | 34  | 0.303 | 0.971 | 0.510 |
| KEGG_VIRAL_MYOCARDITIS                                    | 67  | 0.248 | 0.969 | 0.510 |
| KEGG_ARRHYTHMOGENIC_RIGHT_VENTRICULAR_CARDIOMYOPATHY_ARVC | 73  | 0.202 | 0.968 | 0.493 |
| KEGG_AMYOTROPHIC_LATERAL_SCLEROSIS_ALS                    | 49  | 0.319 | 0.968 | 0.510 |
| KEGG_CARDIAC_MUSCLE_CONTRACTION                           | 70  | 0.280 | 0.954 | 0.510 |
| KEGG_T_CELL_RECEPTOR_SIGNALING_PATHWAY                    | 107 | 0.199 | 0.922 | 0.510 |
| KEGG_GLUTATHIONE_METABOLISM                               | 45  | 0.232 | 0.919 | 0.510 |
| KEGG_GLYCEROLIPID_METABOLISM                              | 43  | 0.244 | 0.909 | 0.493 |
| KEGG_BASE_EXCISION_REPAIR                                 | 33  | 0.440 | 0.903 | 0.493 |
| KEGG_ECM_RECEPTOR_INTERACTION                             | 81  | 0.240 | 0.896 | 0.510 |
| KEGG_MISMATCH_REPAIR                                      | 22  | 0.524 | 0.891 | 0.493 |
| KEGG_NUCLEOTIDE_EXCISION_REPAIR                           | 44  | 0.319 | 0.870 | 0.493 |
| KEGG_HOMOLOGOUS_RECOMBINATION                             | 26  | 0.453 | 0.866 | 0.493 |
| KEGG_GLYCOSPHINGOLIPID_BIOSYNTHESIS_GANGLIO_SERIES        | 15  | 0.280 | 0.860 | 0.510 |
| KEGG_LEISHMANIA_INFECTION                                 | 62  | 0.228 | 0.856 | 0.510 |
| KEGG_AXON_GUIDANCE                                        | 127 | 0.241 | 0.856 | 0.510 |
| KEGG_OLFACTORY_TRANSDUCTION                               | 114 | 0.131 | 0.822 | 0.493 |
| KEGG_ALANINE_ASPARTATE_AND_GLUTAMATE_METABOLISM           | 32  | 0.260 | 0.782 | 0.510 |
| KEGG_GLYCOSAMINOGLYCAN_DEGRADATION                        | 21  | 0.287 | 0.750 | 0.510 |
| KEGG_DNA_REPLICATION                                      | 34  | 0.426 | 0.738 | 0.493 |
| KEGG_NITROGEN_METABOLISM                                  | 23  | 0.300 | 0.733 | 0.510 |

**Table S4. GSEA of SOX9 regulated genes in VCaP cells.**

A list of enriched gene sets based on GSEA of genes differentially expressed after Non-Target-Control (NTC) vs SOX9 siRNA transfection. Enriched signaling pathways shared with those found in clinical data sets are highlighted in yellow. ES: Enrichment Score; NES: Normalized Enrichment Score; NOM p-val: Nominal p-value.

| GENESET NAME                                              | SIZE | ES    | NES   | NOM p-val |
|-----------------------------------------------------------|------|-------|-------|-----------|
| KEGG_NOTCH_SIGNALING_PATHWAY                              | 45   | 0.678 | 1.762 | 0.002     |
| KEGG_TASTE_TRANSDUCTION                                   | 27   | 0.654 | 1.595 | 0.006     |
| KEGG_JAK_STAT_SIGNALING_PATHWAY                           | 113  | 0.622 | 1.518 | 0.039     |
| KEGG_DORSO_VENTRAL_AXIS_FORMATION                         | 21   | 0.697 | 1.485 | 0.036     |
| KEGG_TOLL_LIKE_RECEPTOR_SIGNALING_PATHWAY                 | 87   | 0.556 | 1.394 | 0.122     |
| KEGG_ADHERENS_JUNCTION                                    | 71   | 0.508 | 1.357 | 0.070     |
| KEGG_O_GLYCAN_BIOSYNTHESIS                                | 27   | 0.557 | 1.331 | 0.103     |
| KEGG_GLYCOSAMINOGLYCAN_BIOSYNTHESIS_CHONDROITIN_SULFATE   | 22   | 0.582 | 1.315 | 0.148     |
| KEGG_ABC_TRANSPORTERS                                     | 39   | 0.535 | 1.305 | 0.150     |
| KEGG_SMALL_CELL_LUNG_CANCER                               | 84   | 0.500 | 1.299 | 0.133     |
| KEGG_LEISHMANIA_INFECTION                                 | 67   | 0.597 | 1.285 | 0.209     |
| WNT_ACTIVATION_SIGNATURE                                  | 33   | 0.597 | 1.284 | 0.166     |
| KEGG_THYROID_CANCER                                       | 29   | 0.501 | 1.283 | 0.132     |
| KEGG_ETHER_LIPID_METABOLISM                               | 26   | 0.501 | 1.277 | 0.133     |
| KEGG_ACUTE_MYELOID_LEUKEMIA                               | 57   | 0.476 | 1.241 | 0.173     |
| KEGG_CYTOKINE_CYTOKINE_RECEPTOR_INTERACTION               | 198  | 0.534 | 1.240 | 0.243     |
| KEGG_RIG_I_LIKE_RECEPTOR_SIGNALING_PATHWAY                | 54   | 0.492 | 1.228 | 0.212     |
| KEGG_GRAFT_VERSUS_HOST_DISEASE                            | 30   | 0.680 | 1.209 | 0.323     |
| KEGG_NOD_LIKE_RECEPTOR_SIGNALING_PATHWAY                  | 57   | 0.510 | 1.196 | 0.253     |
| KEGG_INTESTINAL_IMMUNE_NETWORK_FOR_IGA_PRODUCTION         | 36   | 0.628 | 1.178 | 0.340     |
| KEGG_LONG_TERM_POTENTIATION                               | 63   | 0.421 | 1.167 | 0.230     |
| KEGG_ALLOGRAFT_REJECTION                                  | 31   | 0.656 | 1.159 | 0.395     |
| KEGG_APOPTOSIS                                            | 83   | 0.422 | 1.146 | 0.272     |
| KEGG_NATURAL_KILLER_CELL_MEDIATED_CYTOTOXICITY            | 102  | 0.466 | 1.141 | 0.313     |
| KEGG_CYTOSOLIC_DNA_SENSING_PATHWAY                        | 41   | 0.486 | 1.137 | 0.300     |
| KEGG_BASAL_CELL_CARCINOMA                                 | 51   | 0.455 | 1.135 | 0.281     |
| KEGG_CHRONIC_MYELOID_LEUKEMIA                             | 72   | 0.399 | 1.125 | 0.261     |
| KEGG_WNT_SIGNALING_PATHWAY                                | 141  | 0.374 | 1.108 | 0.301     |
| KEGG_N_GLYCAN_BIOSYNTHESIS                                | 46   | 0.508 | 1.103 | 0.363     |
| KEGG_GAP_JUNCTION                                         | 81   | 0.416 | 1.102 | 0.316     |
| KEGG_LONG_TERM_DEPRESSION                                 | 58   | 0.396 | 1.088 | 0.318     |
| KEGG_PENTOSE_PHOSPHATE_PATHWAY                            | 25   | 0.464 | 1.080 | 0.383     |
| KEGG_TIGHT_JUNCTION                                       | 117  | 0.364 | 1.077 | 0.305     |
| KEGG_CYSTEINE_AND_METHIONINE_METABOLISM                   | 28   | 0.446 | 1.061 | 0.388     |
| KEGG_GNRH_SIGNALING_PATHWAY                               | 86   | 0.369 | 1.047 | 0.377     |
| KEGG_PATHWAYS_IN_CANCER                                   | 308  | 0.357 | 1.041 | 0.379     |
| KEGG_AUTOIMMUNE_THYROID_DISEASE                           | 33   | 0.539 | 1.016 | 0.498     |
| KEGG_T_CELL_RECEPTOR_SIGNALING_PATHWAY                    | 102  | 0.406 | 1.007 | 0.434     |
| KEGG_PROSTATE_CANCER                                      | 87   | 0.347 | 1.003 | 0.473     |
| KEGG_PROXIMAL_TUBULE_BICARBONATE_RECLAMATION              | 22   | 0.426 | 0.993 | 0.470     |
| KEGG_PRION_DISEASES                                       | 29   | 0.417 | 0.993 | 0.460     |
| KEGG_TYPE_I_DIABETES_MELLITUS                             | 36   | 0.511 | 0.987 | 0.519     |
| KEGG_ALDOSTERONE_REGULATED_SODIUM_REABSORPTION            | 37   | 0.397 | 0.984 | 0.463     |
| KEGG_MAPK_SIGNALING_PATHWAY                               | 233  | 0.334 | 0.976 | 0.494     |
| KEGG_PRIMARY_IMMUNODEFICIENCY                             | 30   | 0.528 | 0.965 | 0.583     |
| KEGG_B_CELL_RECEPTOR_SIGNALING_PATHWAY                    | 74   | 0.399 | 0.958 | 0.509     |
| KEGG_CELL_ADHESION_MOLECULES_CAMS                         | 122  | 0.402 | 0.957 | 0.517     |
| KEGG_TYPE_II_DIABETES_MELLITUS                            | 40   | 0.366 | 0.947 | 0.533     |
| KEGG_ARRHYTHMOGENIC_RIGHT_VENTRICULAR_CARDIOMYOPATHY_ARVC | 65   | 0.398 | 0.928 | 0.567     |
| KEGG_BLADDER_CANCER                                       | 42   | 0.351 | 0.915 | 0.581     |
| KEGG_ASTHMA                                               | 21   | 0.508 | 0.913 | 0.603     |
| KEGG_ADIPOCYTOKINE_SIGNALING_PATHWAY                      | 61   | 0.322 | 0.903 | 0.604     |
| KEGG_SELENOAMINO_ACID_METABOLISM                          | 26   | 0.372 | 0.900 | 0.586     |
| KEGG_STARCH_AND_SUCROSE_METABOLISM                        | 27   | 0.365 | 0.892 | 0.619     |
| KEGG_AXON_GUIDANCE                                        | 125  | 0.320 | 0.889 | 0.610     |
| KEGG_ENDOMETRIAL_CANCER                                   | 51   | 0.329 | 0.886 | 0.642     |

|                                                               |     |       |       |       |
|---------------------------------------------------------------|-----|-------|-------|-------|
| KEGG_GLYCOSAMINOGLYCAN_BIOSYNTHESIS_HEPARAN_SULFATE           | 25  | 0.353 | 0.865 | 0.690 |
| KEGG_ONE_CARBON_POOL_BY_FOLATE                                | 17  | 0.392 | 0.857 | 0.654 |
| KEGG_COLORECTAL_CANCER                                        | 62  | 0.312 | 0.838 | 0.739 |
| KEGG_PHOSPHATIDYLINOSITOL_SIGNALING_SYSTEM                    | 73  | 0.323 | 0.820 | 0.760 |
| KEGG_ECM_RECEPTOR_INTERACTION                                 | 80  | 0.335 | 0.785 | 0.747 |
| KEGG_VIRAL_MYOCARDITIS                                        | 65  | 0.335 | 0.779 | 0.723 |
| KEGG_ERBB_SIGNALING_PATHWAY                                   | 85  | 0.275 | 0.774 | 0.851 |
| KEGG_OTHER_GLYCAN_DEGRADATION                                 | 15  | 0.393 | 0.770 | 0.765 |
| KEGG_SPHINGOLIPID_METABOLISM                                  | 37  | 0.303 | 0.767 | 0.800 |
| KEGG_P53_SIGNALING_PATHWAY                                    | 67  | 0.293 | 0.746 | 0.827 |
| KEGG_TGF_BETA_SIGNALING_PATHWAY                               | 83  | 0.289 | 0.736 | 0.844 |
| KEGG_GLYCOSPHINGOLIPID_BIOSYNTHESIS_LACTO_AND_NEOLACTO_SERIES | 23  | 0.308 | 0.723 | 0.861 |
| KEGG_CHEMOKINE_SIGNALING_PATHWAY                              | 164 | 0.284 | 0.721 | 0.817 |
| KEGG_LINOLEIC_ACID_METABOLISM                                 | 15  | 0.318 | 0.712 | 0.869 |
| KEGG_DILATED_CARDIOMYOPATHY                                   | 78  | 0.319 | 0.707 | 0.813 |
| KEGG_ANTIGEN_PROCESSING_AND_PRESENTATION                      | 58  | 0.332 | 0.706 | 0.792 |
| KEGG_AMINOACYL_TRNA_BIOSYNTHESIS                              | 41  | 0.328 | 0.675 | 0.835 |
| KEGG_LYSOSOME                                                 | 120 | 0.254 | 0.670 | 0.942 |
| KEGG_GLYCOSAMINOGLYCAN_DEGRADATION                            | 19  | 0.292 | 0.630 | 0.920 |
| KEGG_NITROGEN_METABOLISM                                      | 17  | 0.263 | 0.600 | 0.981 |
| KEGG_HEMATOPOIETIC_CELL_LINEAGE                               | 73  | 0.249 | 0.523 | 0.958 |
|                                                               |     |       |       |       |

**Table S5. GSEA of SOX9 regulated genes in TCGA PCa data set.**

A list of enriched gene sets based on GSEA of genes differentially expressed in SOX9 high vs SOX9 low patients. Enriched signaling pathways shared in VCaP cell lines and in clinical samples are highlighted in yellow. WNT activation signature (excluding the SOX9 gene) was adapted from (43) and is highlighted in red. ES: Enrichment Score; NES: Normalized Enrichment Score; NOM p-val: Nominal p-value.

| GENESET NAME                                                  | SIZE | ES    | NES   | NOM p-val |
|---------------------------------------------------------------|------|-------|-------|-----------|
| KEGG_NOTCH_SIGNALING_PATHWAY                                  | 34   | 0.638 | 1.938 | <0.001    |
| KEGG_GNRH_SIGNALING_PATHWAY                                   | 88   | 0.447 | 1.686 | 0.006     |
| KEGG_VASOPRESSIN_REGULATED_WATER_REABSORPTION                 | 39   | 0.569 | 1.683 | 0.002     |
| KEGG_ANTIGEN_PROCESSING_AND_PRESENTATION                      | 42   | 0.641 | 1.638 | 0.032     |
| KEGG_MAPK_SIGNALING_PATHWAY                                   | 221  | 0.414 | 1.619 | 0.020     |
| KEGG_GLYCOSAMINOGLYCAN_BIOSYNTHESIS_CHONDROITIN_SULFATE       | 17   | 0.615 | 1.600 | 0.049     |
| WNT_ACTIVATION_SIGNATURE                                      | 28   | 0.651 | 1.597 | 0.025     |
| KEGG_GAP_JUNCTION                                             | 69   | 0.473 | 1.574 | 0.048     |
| KEGG_INTESTINAL_IMMUNE_NETWORK_FOR_IGA_PRODUCTION             | 37   | 0.692 | 1.543 | 0.035     |
| KEGG_LEISHMANIA_INFECTION                                     | 54   | 0.652 | 1.542 | 0.080     |
| KEGG_FRUCTOSE_AND_MANNANOSE_METABOLISM                        | 28   | 0.540 | 1.522 | 0.083     |
| KEGG_OTHER_GLYCAN_DEGRADATION                                 | 14   | 0.608 | 1.509 | 0.078     |
| KEGG_NOD_LIKE_RECEPTOR_SIGNALING_PATHWAY                      | 48   | 0.503 | 1.508 | 0.076     |
| KEGG_GRAFT_VERSUS_HOST_DISEASE                                | 23   | 0.742 | 1.492 | 0.064     |
| KEGG_DORSO_VENTRAL_AXIS_FORMATION                             | 17   | 0.595 | 1.491 | 0.093     |
| KEGG_CYTOSOLIC_DNA_SENSING_PATHWAY                            | 38   | 0.464 | 1.479 | 0.085     |
| KEGG_GLYCOSAMINOGLYCAN_BIOSYNTHESIS_HEPARAN_SULFATE           | 18   | 0.479 | 1.477 | 0.071     |
| KEGG_PATHWAYS_IN_CANCER                                       | 272  | 0.386 | 1.452 | 0.058     |
| KEGG_TAURINE_AND_HYPOTAURINE_METABOLISM                       | 9    | 0.635 | 1.432 | 0.070     |
| KEGG_BLADDER_CANCER                                           | 35   | 0.469 | 1.419 | 0.054     |
| KEGG_ALLOGRAFT_REJECTION                                      | 26   | 0.656 | 1.413 | 0.119     |
| KEGG_ACUTE_MYELOID_LEUKEMIA                                   | 47   | 0.454 | 1.382 | 0.096     |
| KEGG_ENDOCYTOSIS                                              | 150  | 0.397 | 1.378 | 0.102     |
| KEGG_GLYCOSAMINOGLYCAN_DEGRADATION                            | 13   | 0.482 | 1.359 | 0.171     |
| KEGG_TYPE_I_DIABETES_MELLITUS                                 | 28   | 0.609 | 1.351 | 0.161     |
| KEGG_TOLL_LIKE_RECEPTOR_SIGNALING_PATHWAY                     | 79   | 0.429 | 1.347 | 0.148     |
| KEGG_VIBRIO_CHOLERAE_INFECTION                                | 39   | 0.431 | 1.344 | 0.127     |
| KEGG_INSULIN_SIGNALING_PATHWAY                                | 114  | 0.376 | 1.342 | 0.099     |
| KEGG_AUTOIMMUNE_THYROID_DISEASE                               | 30   | 0.597 | 1.338 | 0.189     |
| KEGG_CIRCADIAN_RHYTHM_MAMMAL                                  | 10   | 0.680 | 1.338 | 0.154     |
| KEGG_BASAL_CELL_CARCINOMA                                     | 49   | 0.427 | 1.318 | 0.180     |
| KEGG_EPITHELIAL_CELL_SIGNALING_IN_HELICOBACTER_PYLORI_INFECTI | 46   | 0.442 | 1.309 | 0.129     |
| KEGG_VIRAL_MYOCARDITIS                                        | 46   | 0.528 | 1.308 | 0.225     |
| KEGG_FC_GAMMA_R_MEDIATED_PHAGOCYTOSIS                         | 77   | 0.400 | 1.300 | 0.175     |
| KEGG_VEGF_SIGNALING_PATHWAY                                   | 65   | 0.354 | 1.298 | 0.125     |
| KEGG_AMYOTROPHIC_LATERAL_SCLEROSIS_ALS                        | 44   | 0.322 | 1.298 | 0.106     |
| KEGG_COMPLEMENT_AND_COAGULATION_CASCADES                      | 58   | 0.561 | 1.293 | 0.186     |
| KEGG_PROSTATE_CANCER                                          | 68   | 0.442 | 1.291 | 0.103     |
| KEGG_ABC_TRANSPORTERS                                         | 36   | 0.402 | 1.290 | 0.124     |
| KEGG_ADHERENS_JUNCTION                                        | 59   | 0.464 | 1.287 | 0.196     |
| KEGG_VASCULAR_SMOOTH_MUSCLE_CONTRACTION                       | 97   | 0.420 | 1.283 | 0.204     |
| KEGG_APOPTOSIS                                                | 73   | 0.356 | 1.275 | 0.158     |
| KEGG_JAK_STAT_SIGNALING_PATHWAY                               | 122  | 0.371 | 1.268 | 0.154     |
| KEGG_LYSOSOME                                                 | 92   | 0.450 | 1.267 | 0.200     |
| KEGG_TYPE_II_DIABETES_MELLITUS                                | 41   | 0.370 | 1.257 | 0.112     |
| KEGG_LONG_TERM_DEPRESSION                                     | 56   | 0.392 | 1.255 | 0.166     |
| KEGG_T_CELL_RECEPTOR_SIGNALING_PATHWAY                        | 89   | 0.360 | 1.251 | 0.202     |
| KEGG_ASTHMA                                                   | 21   | 0.627 | 1.244 | 0.232     |
| KEGG_B_CELL_RECEPTOR_SIGNALING_PATHWAY                        | 61   | 0.379 | 1.237 | 0.203     |
| KEGG_CELL_ADHESION_MOLECULES_CAMS                             | 106  | 0.448 | 1.233 | 0.245     |
| KEGG_ARRHYTHMOGENIC_RIGHT_VENTRICULAR_CARDIOMYOPATHY_ARVC     | 68   | 0.465 | 1.227 | 0.250     |
| KEGG_ADIPOCYTOKINE_SIGNALING_PATHWAY                          | 59   | 0.366 | 1.219 | 0.190     |
| KEGG_ENDOMETRIAL_CANCER                                       | 41   | 0.398 | 1.216 | 0.178     |
| KEGG_RIG_I_LIKE_RECEPTOR_SIGNALING_PATHWAY                    | 56   | 0.316 | 1.216 | 0.193     |
| KEGG_PHOSPHATIDYLINOSITOL_SIGNALING_SYSTEM                    | 61   | 0.336 | 1.203 | 0.209     |
| KEGG_PANTOTHENATE_AND_COA_BIOSYNTHESIS                        | 12   | 0.460 | 1.193 | 0.244     |



|                                                   |     |       |       |       |
|---------------------------------------------------|-----|-------|-------|-------|
| KEGG_N_GLYCAN_BIOSYNTHESIS                        | 37  | 0.435 | 1.185 | 0.300 |
| KEGG_O_GLYCAN_BIOSYNTHESIS                        | 27  | 0.386 | 1.180 | 0.222 |
| KEGG_CHRONIC_MYELOID_LEUKEMIA                     | 59  | 0.412 | 1.172 | 0.265 |
| KEGG_AXON_GUIDANCE                                | 103 | 0.330 | 1.172 | 0.238 |
| KEGG_ETHER_LIPID_METABOLISM                       | 27  | 0.387 | 1.169 | 0.243 |
| KEGG_SMALL_CELL_LUNG_CANCER                       | 69  | 0.383 | 1.161 | 0.278 |
| KEGG_RIBOFLAVIN_METABOLISM                        | 11  | 0.480 | 1.153 | 0.286 |
| KEGG_ECM_RECEPTOR_INTERACTION                     | 68  | 0.475 | 1.144 | 0.346 |
| KEGG_SULFUR_METABOLISM                            | 9   | 0.447 | 1.139 | 0.289 |
| KEGG_AMINO_SUGAR_AND_NUCLEOTIDE_SUGAR_METABOLISM  | 38  | 0.392 | 1.126 | 0.324 |
| KEGG_MELANOGENESIS                                | 87  | 0.298 | 1.125 | 0.264 |
| KEGG_PRION_DISEASES                               | 32  | 0.405 | 1.122 | 0.305 |
| KEGG_REGULATION_OF_ACTIN_CYTOSKELETON             | 170 | 0.328 | 1.121 | 0.324 |
| KEGG_LEUKOCYTE_TRANSENDOTHELIAL_MIGRATION         | 91  | 0.375 | 1.119 | 0.319 |
| KEGG_THYROID_CANCER                               | 25  | 0.385 | 1.116 | 0.326 |
| KEGG_PATHOGENIC_ESCHERICHIA_COLI_INFECTION        | 31  | 0.398 | 1.115 | 0.333 |
| KEGG_ARACHIDONIC_ACID_METABOLISM                  | 46  | 0.393 | 1.109 | 0.310 |
| KEGG_CYTOKINE_CYTOKINE_RECEPTOR_INTERACTION       | 205 | 0.388 | 1.090 | 0.389 |
| KEGG_TIGHT_JUNCTION                               | 99  | 0.318 | 1.088 | 0.340 |
| KEGG_ALDOSTERONE_REGULATED_SODIUM_REABSORPTION    | 37  | 0.383 | 1.069 | 0.351 |
| KEGG_CHEMOKINE_SIGNALING_PATHWAY                  | 144 | 0.301 | 1.064 | 0.365 |
| KEGG_NATURAL_KILLER_CELL_MEDIATED_CYTOTOXICITY    | 84  | 0.307 | 1.056 | 0.389 |
| KEGG_NEUROTROPHIN_SIGNALING_PATHWAY               | 106 | 0.291 | 1.053 | 0.395 |
| KEGG_ALPHA_LINOLENIC_ACID_METABOLISM              | 17  | 0.416 | 1.052 | 0.364 |
| KEGG_COLORECTAL_CANCER                            | 53  | 0.378 | 1.050 | 0.424 |
| KEGG_WNT_SIGNALING_PATHWAY                        | 119 | 0.271 | 1.049 | 0.371 |
| KEGG_DILATED_CARDIOMYOPATHY                       | 82  | 0.406 | 1.035 | 0.407 |
| KEGG_TGF_BETA_SIGNALING_PATHWAY                   | 69  | 0.369 | 1.034 | 0.405 |
| KEGG_FC_EPSILON_RI_SIGNALING_PATHWAY              | 67  | 0.272 | 1.029 | 0.373 |
| KEGG_HEMATOPOIETIC_CELL_LINEAGE                   | 71  | 0.412 | 1.022 | 0.448 |
| KEGG_NON_SMALL_CELL_LUNG_CANCER                   | 44  | 0.307 | 1.020 | 0.435 |
| KEGG_ERBB_SIGNALING_PATHWAY                       | 73  | 0.302 | 1.019 | 0.433 |
| KEGG_PORPHYRIN_AND_CHLOROPHYLL_METABOLISM         | 21  | 0.384 | 1.015 | 0.442 |
| KEGG_SYSTEMIC_LUPUS_ERYTHEMATOSUS                 | 97  | 0.358 | 1.008 | 0.436 |
| KEGG_FOCAL_ADHESION                               | 165 | 0.363 | 0.996 | 0.470 |
| KEGG_HYPERTROPHIC_CARDIOMYOPATHY_HCM              | 74  | 0.402 | 0.994 | 0.439 |
| KEGG_MELANOMA                                     | 53  | 0.272 | 0.993 | 0.449 |
| KEGG_GLYCEROPHOSPHOLIPID_METABOLISM               | 61  | 0.257 | 0.985 | 0.484 |
| KEGG_PURINE_METABOLISM                            | 130 | 0.256 | 0.962 | 0.530 |
| KEGG_STARCH_AND_SUCROSE_METABOLISM                | 25  | 0.360 | 0.959 | 0.509 |
| KEGG_PANCREATIC_CANCER                            | 62  | 0.326 | 0.949 | 0.532 |
| KEGG_SNARE_INTERACTIONS_IN_VESICULAR_TRANSPORT    | 31  | 0.318 | 0.946 | 0.529 |
| KEGG_GLYCOSPHINGOLIPID_BIOSYNTHESIS_GLOBO_SERIES  | 12  | 0.363 | 0.940 | 0.555 |
| KEGG_GLYCEROLIPID_METABOLISM                      | 36  | 0.276 | 0.938 | 0.575 |
| KEGG_TASTE_TRANSDUCTION                           | 42  | 0.351 | 0.926 | 0.557 |
| KEGG_ALZHEIMERS_DISEASE                           | 129 | 0.267 | 0.917 | 0.543 |
| KEGG_CALCIIUM_SIGNALING_PATHWAY                   | 153 | 0.271 | 0.900 | 0.636 |
| KEGG_LONG_TERM_POTENTIATION                       | 59  | 0.245 | 0.898 | 0.588 |
| KEGG_GALACTOSE_METABOLISM                         | 21  | 0.308 | 0.887 | 0.632 |
| KEGG_ASCORBATE_AND_ALDARATE_METABOLISM            | 7   | 0.478 | 0.871 | 0.652 |
| KEGG_P53_SIGNALING_PATHWAY                        | 54  | 0.318 | 0.868 | 0.648 |
| KEGG_INOSITOL_PHOSPHATE_METABOLISM                | 46  | 0.249 | 0.859 | 0.699 |
| KEGG_PHENYLALANINE_METABOLISM                     | 14  | 0.386 | 0.856 | 0.655 |
| KEGG_ARGININE_AND_PROLINE_METABOLISM              | 46  | 0.282 | 0.849 | 0.675 |
| KEGG_RNA_POLYMERASE                               | 20  | 0.378 | 0.846 | 0.633 |
| KEGG_PRIMARY_IMMUNODEFICIENCY                     | 31  | 0.328 | 0.827 | 0.664 |
| KEGG_METABOLISM_OF_XENOBIOTICS_BY_CYTOCHROME_P450 | 33  | 0.295 | 0.814 | 0.744 |
| KEGG_TYROSINE_METABOLISM                          | 33  | 0.282 | 0.814 | 0.713 |
| KEGG_CARDIAC_MUSCLE_CONTRACTION                   | 62  | 0.242 | 0.787 | 0.824 |
| KEGG_RENAL_CELL_CARCINOMA                         | 59  | 0.265 | 0.755 | 0.782 |

|                                                               |     |       |       |       |
|---------------------------------------------------------------|-----|-------|-------|-------|
| KEGG_MATURITY_ONSET_DIABETES_OF_THE_YOUNG                     | 20  | 0.336 | 0.744 | 0.812 |
| KEGG_GLYCOLYSIS_GLUONEOGENESIS                                | 54  | 0.232 | 0.738 | 0.824 |
| KEGG_GLYCOSPHINGOLIPID_BIOSYNTHESIS_LACTO_AND_NEOLACTO_SERIES | 23  | 0.243 | 0.728 | 0.874 |
| KEGG_PENTOSE_PHOSPHATE_PATHWAY                                | 22  | 0.292 | 0.703 | 0.767 |
| KEGG_HUNTINGTONS_DISEASE                                      | 139 | 0.226 | 0.688 | 0.779 |
| KEGG_PROXIMAL_TUBULE_BICARBONATE_RECLAMATION                  | 19  | 0.244 | 0.660 | 0.954 |
| KEGG_MTOR_SIGNALING_PATHWAY                                   | 46  | 0.233 | 0.651 | 0.956 |
| KEGG_PENTOSE_AND_GLUCURONATE_INTERCONVERSIONS                 | 7   | 0.332 | 0.650 | 0.878 |
| KEGG_STEROID_HORMONE_BIOSYNTHESIS                             | 23  | 0.238 | 0.622 | 0.963 |
| KEGG_NICOTINATE_AND_NICOTINAMIDE_METABOLISM                   | 21  | 0.236 | 0.610 | 0.966 |
| KEGG_SPLICEOSOME                                              | 94  | 0.217 | 0.494 | 0.879 |

**Table S6. GSEA of SOX9 regulated genes in a MSKCC PCa data set.**

A list of enriched gene sets based on GSEA of genes differentially expressed in SOX9 high vs SOX9 low patients. Enriched signaling pathways shared in VCaP cell lines and in clinical samples are highlighted in yellow. WNT activation signature (excluding the SOX9 gene) was adapted from (43) and is highlighted in red. ES: Enrichment Score; NES: Normalized Enrichment Score; NOM p-val: Normalized p-value.

| Gene Symbol | FC ([SOX9i-A] vs [NTC]) | FC ([SOX9i-B] vs [NTC]) | Response to SOX9i | SOX9 binding Site                         |
|-------------|-------------------------|-------------------------|-------------------|-------------------------------------------|
| FZD7        | -2.705366               | -4.3086505              | down              | Promoter                                  |
| FZD10       | -1.1041493              | -2.5123212              | down              | Promoter                                  |
| MYC         | -1.299235               | -2.4288185              | down              | Promoter                                  |
| YAP1        | -2.0436602              | -2.2455935              | down              | Promoter                                  |
| WNT2        | -1.0057149              | -2.00734                | down              | Promoter                                  |
| TCF7L2      | -1.6585635              | -1.7348635              | down              | Promoter                                  |
| PPARD       | -1.0776321              | -1.5920618              | down              | Adjacent Upstream                         |
| WNT10B      | -1.4100173              | -1.5008799              | down              | Promoter                                  |
| PPP2R3A     | -1.3735853              | -1.4141906              | down              | No binding within 100Kb Up and Downstream |
| DVL1        | -1.2100639              | -1.4027503              | down              | Promoter                                  |
| PPP2R2C     | -1.1863034              | -1.329133               | down              | Promoter& Intron                          |
| LRP5        | -1.1017319              | -1.3281375              | down              | Promoter                                  |
| PPM1J       | -1.3298713              | -1.3213532              | down              | Promoter                                  |
| LEF1        | -1.1778091              | -1.2759897              | down              | Promoter                                  |
| JUN         | -1.287625               | -1.272834               | down              | Promoter                                  |
| PRKCZ       | -1.2250994              | -1.2629664              | down              | Promoter                                  |
| FZD2        | -1.7199576              | -1.237837               | down              | Promoter                                  |
| PPP2R5C     | -1.0531132              | -1.2257257              | down              | Intron1                                   |
| CSNK1E      | -1.1666708              | -1.2198046              | down              | Adjacent Downstream                       |
| PPP2R2B     | -1.1469198              | -1.2157998              | down              | Intron                                    |
| WNT3        | -1.1431704              | -1.1987146              | down              | Intron                                    |
|             |                         |                         |                   |                                           |
| WNT5A       | 2.0773335               | 3.0172555               | up                | Promoter                                  |
| LDLR        | 1.2672231               | 1.9285403               | up                | Promoter                                  |
| FZD8        | 1.2921532               | 1.8435903               | up                | Promoter                                  |
| FZD5        | 1.2987889               | 1.8212223               | up                | Promoter                                  |
| PRKCD       | 1.0953419               | 1.4727684               | up                | 4.9K Upstream                             |
| PPP2R4      | 1.1606416               | 1.31531                 | up                | 30K Upstream and 14K Downstream           |
| MAP2K4      | 1.2701262               | 1.2752674               | up                | No binding within 100Kb Up and Downstream |
| PPP2R1B     | 1.7012435               | 1.2437013               | up                | No binding within 100Kb Up and Downstream |
| PPP2CB      | 1.076358                | 1.2392744               | up                | 104Kb Upstream                            |
| NFYA        | 1.1331067               | 1.2187467               | up                | Intron                                    |
| WNT4        | 1.005561                | 1.1887566               | up                | Promoter                                  |

**Table S7. SOX9 regulated WNT pathway genes in VCaP cells.** WNT pathway genes with absolute fold change (SOX9i-B/NTC) of more than 1.2 are listed, together with the corresponding SOX9 binding information based on SOX9 CHIP-seq results.

## Supplementary Methods

**RNA interference.** siGENOME siRNA (GE Healthcare Dharmacon) were the following:

SOX9i-A: D-021507-02

SOX9i-B: D-021507-03

NTC-A: D-001210-02

NTC-B: D-001210-04

**Quantitative reverse transcription PCR(qRT-PCR).** Primers were from primer bank

(<http://pga.mgh.harvard.edu/primerbank/>), or designed using primer 3

(<http://bioinfo.ut.ee/primer3/>) and synthesized by Integrated DNA Technologies.

|           | Reverse Sequence             | Forward Sequence          |
|-----------|------------------------------|---------------------------|
| SOX9      | CCTGCCCGTTCTTCACCGAC         | GCTCTGGAGACTTCTGAACGAGAGC |
| PLAT-1    | CTTCCCAGCAAATCCTTCGGG        | AGCGAGCCAAGGTGTTTCAA      |
| PLAT-2    | GGTAGGCTGACCCATTCCC          | AAACCCAGATCGAGACTCAAAGC   |
| CCL2      | TGGAATCCTGAACCCACTTCT        | CAGCCAGATGCAATCAATGCC     |
| CXCL10    | TGATGGCCTTCGATTCTGGATT       | GTGGCATTCAAGGAGTACCTC     |
| CCL20     | CGCACACAGACAACCTTTTCTTT      | TGCTGTACCAAGAGTTTGCTC     |
| IL8       | AACCCTCTGCACCCAGTTTTTC       | ACTGAGAGTGATTGAGAGTGGAC   |
| CXCL5     | TGGCGAACACTTGCAGATTAC        | AGCTGCGTTGCGTTTGTTTAC     |
| PDGFC-1   | CTTGGGCTGTGAATACTTCCATT      | GA CTCAGGCGGAATCCAACC     |
| PDGFC-2   | GGGTCTTCAAGCCCAAATCTT        | ATTCACAGCCCAAGGTTTCCT     |
| TXNIP     | GCAGGTA CTCCGAAGTCTGT        | TGTGTGAAGTTACTCGTGCAAA    |
| CXCL1-1   | GCCCATTCTTGAGTGTGGCTATGAC    | CAGCAGGAGCGTCCGTGGC       |
| CXCL1-2   | CAGTTGGATTTGTCACTGTT CAGCATC | TGCGCCCAAACCGAAGTCATAG    |
| GADD45A-1 | CACAACACCACGTTATCGGG         | GAGAGCAGAAGACCGAAAAGGA    |
| GADD45A-2 | GATCCATGTAGCGACTTTCCC        | CCCTGATCCAGGCGTTTTG       |
| KLF10-1   | ACGAATCACACTTGTTGCCTG        | ACTGCCAAACCTCACATTGC      |
| KLF10-2   | CAGCCTCAACATTTAGGTGGG        | GCAACAAGTGTGATTGTCATAC    |
| ARRDC4    | ATTGGCGACCATGTGTCGAAT        | GTTCTCTCGTCTGATTGTTCC     |
| VEGFA     | AGGGTCTCGATTGGATGGCA         | AGGGCAGAATCATCACGAAGT     |
| CXCL3     | GCTCCCC TTGTT CAGTATCTTTT    | CGCCCAAACCGAAGTCATAG      |
| SHH-1     | ATCGCTCGGAGTTTCTGGAGA        | CTCGCTGCTGGTATGCTCG       |

|        |                           |                           |
|--------|---------------------------|---------------------------|
| SHH-2  | GGCCCTCGTAGTGCAGAGA       | GAAACTCCGAGCGATTTAAGGA    |
| FZD7-1 | AGGTGAGAACGGTAAAGAGCG     | GTGCCAACGGCCTGATGTA       |
| FZD7-2 | ACGATCATGGTCATCAGGTA      | CAGACGTGCAAGAGCTATGC      |
| TCF4-1 | GATCCGTTGGGGAGGTAGG       | TGGAGGGCTCTTTAAGGGG       |
| TCF4-2 | GCCAGGCGATAGTGGGTAAT      | GCCTCTTATCACGTACAGCAAT    |
| YAP1-1 | GCAGAGAAGCTGGAGAGGAATGAGC | AATCCCACTCCCGACAGGCC      |
| YAP1-2 | GTTTCATGGCAAACGAGGGTCAAG  | ATGAACTCGGCTTCAGGTCCTCTTC |
| LEF1   | GGCATCATTATGTACCCGGAAT    | AGAACACCCCGATGACGGA       |
| LRP6   | ATGGCTTCTTCGCTGACATCA     | ACGATTGTAGTTGGAGGCTTG     |
| WNT5A  | CGCCTTCTCCGATGTACTGC      | ATTCTTGGTGGTCGCTAGGTA     |
| FZD5   | ACGCACAGGTAGCAGGCTGACAG   | TCGGTGCTGTGCTTCATCTCCAC   |
| LRP5   | CAGGCATGGATGGAGCGGGTC     | GGCTCGTTCGGCAGAAGGTG      |
| AXIN2  | TGCTGTTGTTCTCAATGTACCTT   | ACCAAACTTTACGAGTAGCCAA    |
| GAPDH  | CGCCCCACTTGATTTTGA        | TTGCCATCAATGACCCCTTCA     |

### Primary antibodies used in immunoblotting

| Antigen                 | Vendor         | Catalogue number | Dilution |
|-------------------------|----------------|------------------|----------|
| active $\beta$ -catenin | Millipore      | 05-665           | 1:1000   |
| SOX9                    | Millipore      | AB-5535          | 1:10000  |
| Myc                     | Epitomics      | 1472-1           | 1:10000  |
| Cyclin D1               | Santa Cruz     | Sc-8396          | 1:1000   |
| LEF1                    | Cell Signaling | 2230             | 1:1000   |
| GAPDH                   | Abcam          | Ab-9485          | 1:10000  |
| Phospho-LRP6(Ser1490)   | Cell Signaling | 2568             | 1:200    |

### Primary antibodies used in IHC

| Antigen | Vendor         | Catalogue number | Dilution |
|---------|----------------|------------------|----------|
| YAP1    | Cell Signaling | 4912             | 1:2000   |
| SOX9    | Millipore      | AB-5535          | 1:5000   |

### Primary antibodies used in ChIP and ChIP-Seq

| Antigen               | Vendor    | Catalogue number |
|-----------------------|-----------|------------------|
| SOX9 antibody 1 (Ab1) | Millipore | AB-5535          |
| SOX9 antibody 1 (Ab2) | Abcam     | ab3697           |

### The primers for ChIP of Col2a1 intron1 site are the following:

Forward: 5'-TCCGCGAGGAACCAGTTTAA-3',

Reverse: 5'-TGTTTGCATTGGGAGATTGG-3'.

### ISH:

The probe sets were purchased from Advanced Cell Diagnostics (ACD) and are listed as the following:

AXIN2 (Human): 400241  
FZD5 (Human): 414051  
FZD7 (Human): 414061  
Sox9 (Mouse): 401051  
Axin2 (Mouse): 400331
